# Supplementary material for: Targeting the intestinal circadian clock by meal timing ameliorates gastrointestinal inflammation
Source: PubMed Central journal article supplement (PMC11291886; doi:10.1038/s41423-024-01189-z), 2024-06-25

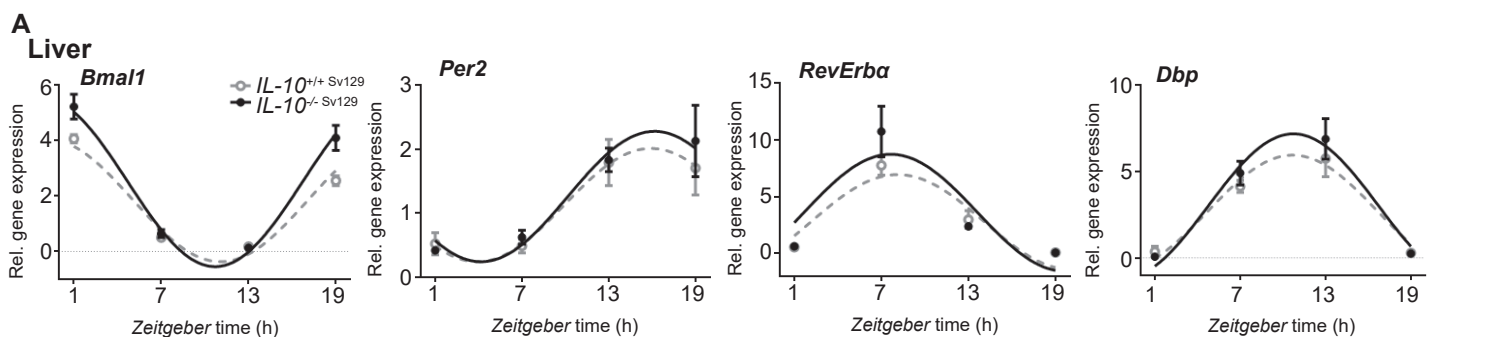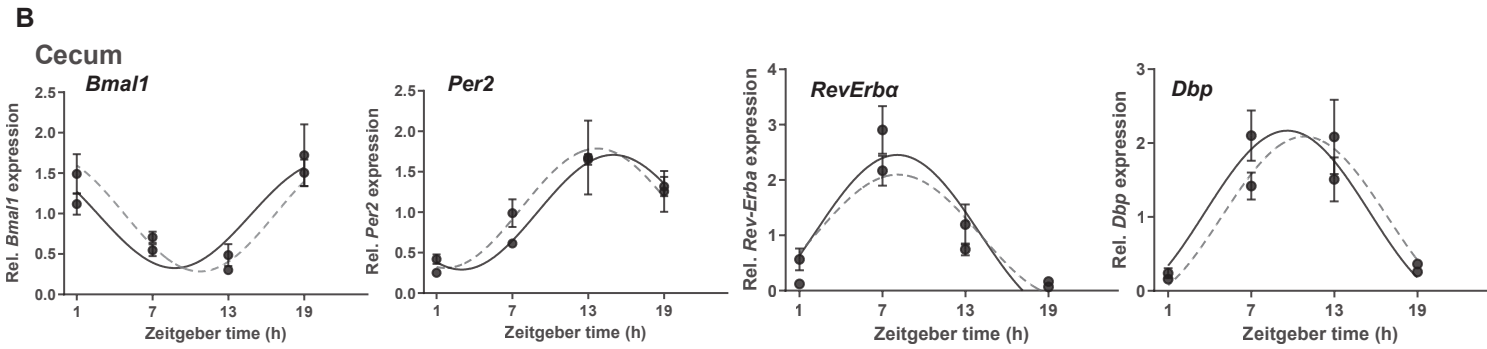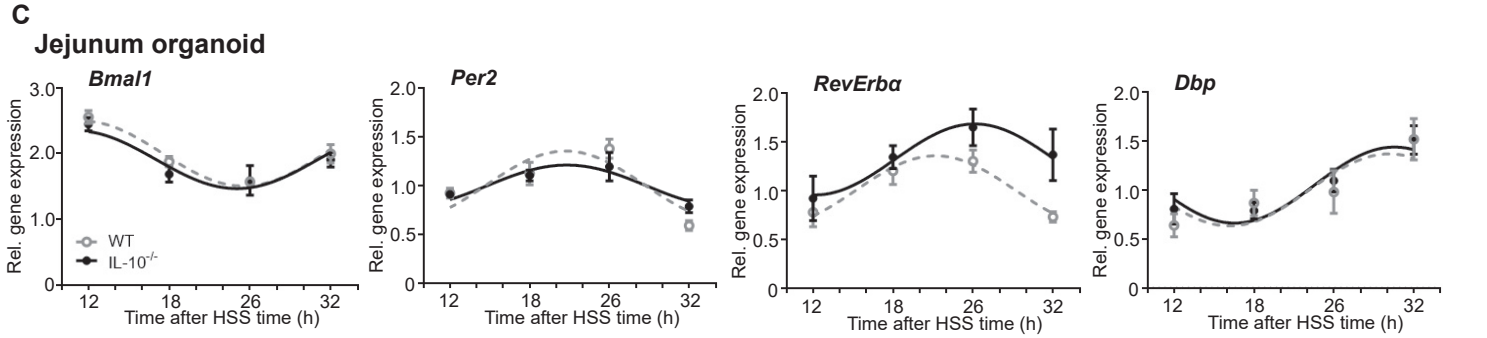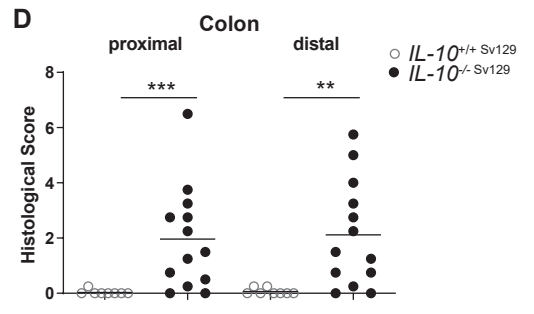

Supplement: 41423_2024_1189_MOESM2_ESM.pdf [file 41423_2024_1189_MOESM2_ESM.pdf]
