# Supplementary material for: Targeting the intestinal circadian clock by meal timing ameliorates gastrointestinal inflammation
Source: PubMed Central journal article supplement (PMC11291886; doi:10.1038/s41423-024-01189-z), 2024-06-25
Supplement: 41423_2024_1189_MOESM10_ESM.pdf [file 41423_2024_1189_MOESM10_ESM.pdf]

SupplementalTable 3 Statistical comparison between IL-10<sup>-/-</sup> AD and IL-10<sup>-/-</sup> RF groups

| 2 way ANOVA comparison for group IL-10 <sup>-/-</sup> AD vs IL-10 <sup>-/-</sup> RF |                            |   |   |    |    |    |    |    |
|-------------------------------------------------------------------------------------|----------------------------|---|---|----|----|----|----|----|
| Fig. 2B                                                                             |                            |   |   |    |    |    |    |    |
| Time points                                                                         | 1                          | 4 | 7 | 10 | 13 | 16 | 19 | 22 |
| Significance                                                                        | Group differences p=0.0004 |   |   |    |    |    |    |    |
|                                                                                     |                            |   |   |    |    |    |    |    |
| Fig. 2C                                                                             |                            |   |   |    |    |    |    |    |
| <i>Bacteroidota</i>                                                                 | Group differences p<0.0001 |   |   |    |    |    |    |    |
| <i>Firmicutes</i>                                                                   | Group differences p<0.0001 |   |   |    |    |    |    |    |
|                                                                                     |                            |   |   |    |    |    |    |    |
| Fig. 2E                                                                             |                            |   |   |    |    |    |    |    |
| <i>Lachnospiraceae</i>                                                              | Group differences p<0.0001 |   |   |    |    |    |    |    |
| <i>Oscillospiraceae</i>                                                             | Group differences p=0.0005 |   |   |    |    |    |    |    |
| zOTU128                                                                             | Group differences p=0.0112 |   |   |    |    |    |    |    |
| zOTU130                                                                             | Group differences p=0.0411 |   |   |    |    |    |    |    |
