# Supplementary material for: Targeting the intestinal circadian clock by meal timing ameliorates gastrointestinal inflammation
Source: PubMed Central journal article supplement (PMC11291886; doi:10.1038/s41423-024-01189-z), 2024-06-25
Supplement: 41423_2024_1189_MOESM13_ESM.pdf [file 41423_2024_1189_MOESM13_ESM.pdf]

**Supplemental Table 6: Summary of sample size of all experiments for all Figures**

**WTAD:** control group under ad libitum **WTRF:** control group under restricted feeding **KOAD:** IL-10<sup>-/-</sup> group under ad libitum **KORF:** IL-10<sup>-/-</sup> under restricted feeding

|                               |                         |                                        |                         |                         |
|-------------------------------|-------------------------|----------------------------------------|-------------------------|-------------------------|
| Fig.1B-E<br>n (6 time points) | WTAD<br>4,5,4,4,4,4     | WTRF<br>4,4,4,4,4,4                    | KOAD<br>4,4,4,4,4,4     | KORF<br>3,2,4,2,4,4     |
| Fig.2B-E<br>n (8 time points) | WTAD<br>6,5,5,4,5,6,5,5 | WTRF<br>7,9,9,7,8,8,9,8                | KOAD<br>3,4,5,5,5,4,5,4 | KORF<br>6,7,9,9,7,9,8,9 |
| Fig.2G<br>n (8 time points)   | WTAD<br>6,5,5,4,5,6,5,5 | KOAD<br>3,4,5,5,5,4,5,4                |                         |                         |
| Fig.2G-H<br>n (8 time points) | WTAD<br>3,3,3,3,3,3,3,3 | KOAD<br>6,6,6,6,6,6,6,6                |                         |                         |
| Fig.4<br>n (6 time points)    | Control<br>4,4,4,4,4,4  | Bmal1IEC <sup>-/-</sup><br>4,4,4,4,4,4 |                         |                         |

Fig.3, Fig.5-6 Data are illustrated as single dot and each dot represents one mouse
